# Supplementary material for: Novel Short Process for p-Xylene Production Based on the Selectivity Intensification of Toluene Methylation with Methanol
Source: PubMed Central journal article supplement — ACS Omega. 2021 Dec 30;7(1):1211–22. doi: 10.1021/acsomega.1c05817 (PMC8757337; doi:10.1021/acsomega.1c05817), 2021-12-30
Supplement: ao1c05817_si_001.pdf [file ao1c05817_si_001.pdf]

# A novel short process for p-xylene production based on the selectivity intensification of toluene methylation with methanol

Dongliang Wang<sup>#1,2</sup>, Junqiang Zhang<sup>#1,2</sup>, Peng Dong<sup>1,2</sup>, Guixian Li<sup>\*,1,2</sup>, Xueying Fan<sup>3</sup> and Yong Yang<sup>\*,1,2</sup>

1 School of Petrochemical Engineering, Lanzhou University of Technology, Lanzhou 730050, Gansu, China; 2 Key Laboratory of Low Carbon Energy and Chemical Engineering of Gansu Province, Lanzhou 730050, Gansu, China; 3 Automation Institute, PetroChina Lanzhou Petrochemical Company, Lanzhou 730060, Gansu, China

# These authors contributed equally to this work.

\* Corresponding author

\* (Guixian Li) E-mail: lgxwyf@163.com

\* (Yong Yang) E-mail: yangy@lut.edu.cn

## 1.Stream data for p-xylene production process

### Case 1: Ashraf's process over catalyst A

An existing PX production process proposed by Ashraf et al.<sup>23</sup>, was used as Case 1. The detail flowsheet is shown in Figure S1, and the Material balance is in Table S1.

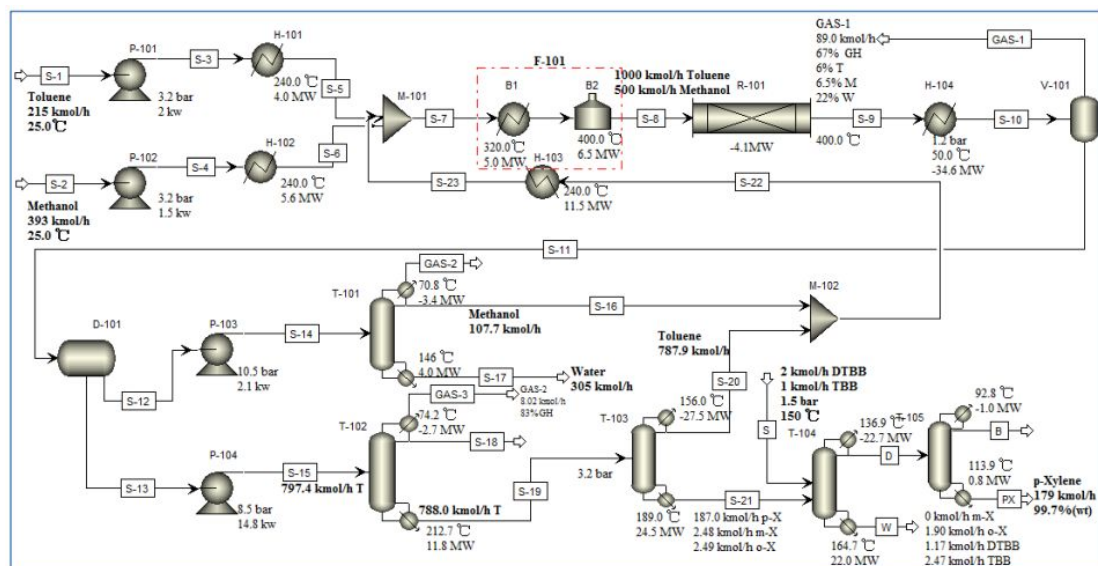

Figure.S1 flowsheet diagram for process case1

**Table S1 Material balance of stream for flowsheet in Figure S1**

| <b>Stream name</b>         |        | <b>S-1</b>  | <b>S-2</b>  | <b>S-8</b>  | <b>S-10</b> | <b>GAS-1</b> | <b>S-13</b> | <b>GAS-2</b> | <b>S-16</b> |
|----------------------------|--------|-------------|-------------|-------------|-------------|--------------|-------------|--------------|-------------|
| mole flow                  | kmol/h | 215.24      | 392.62      | 1525.00     | 1606.34     | 89.00        | 1084.13     | 3.90         | 120.10      |
| mass flow                  | kg/h   | 19832.3     | 12580.40    | 108679.3    | 108679.3    | 2679.93      | 98160.10    | 114.74       | 3948.35     |
| vapor fraction             |        | 0           | 0           | 1           | 0.04        | 1            | 0           | 1            | 0           |
| temperature                | °C     | 25.00       | 25.00       | 400.00      | 50.00       | 47.24        | 46.00       | 70.77        | 70.77       |
| pressure                   | bar    | 1.00        | 1.00        | 3.00        | 2.00        | 1.00         | 1.20        | 4.00         | 4.00        |
| <b>Component Mole Flow</b> |        |             |             |             |             |              |             |              |             |
| Toluene                    | kmol/h | 215.24      | 0.00        | 1000.89     | 805.65      | 6.67         | 797.38      | 0.01         | 1.59        |
| Methanol                   | kmol/h | 0.00        | 392.62      | 500.00      | 173.72      | 5.18         | 55.40       | 1.21         | 107.72      |
| p-X                        | kmol/h | 0.00        | 0.00        | 12.11       | 199.74      | 0.45         | 199.15      | 0.00         | 0.14        |
| Water                      | kmol/h | 0.00        | 0.00        | 9.43        | 340.26      | 17.90        | 7.67        | 0.04         | 43.10       |
| Benzene                    | kmol/h | 0.00        | 0.00        | 1.92        | 8.44        | 0.14         | 8.28        | 0.00         | 0.02        |
| GH                         | kmol/h | 0.00        | 0.00        | 0.98        | 73.35       | 60.64        | 9.10        | 2.63         | 0.98        |
| m-X                        | kmol/h | 0.00        | 0.00        | 0.14        | 2.63        | 0.01         | 2.62        | 0.00         | 0.00        |
| o-X                        | kmol/h | 0.00        | 0.00        | 0.05        | 2.54        | 0.00         | 2.52        | 0.00         | 0.02        |
| TBB                        | kmol/h | 0.00        | 0.00        | 0.00        | 0.00        | 0.00         | 0.00        | 0.00         | 0.00        |
| DTBB                       | kmol/h | 0.00        | 0.00        | 0.00        | 0.00        | 0.00         | 0.00        | 0.00         | 0.00        |
| TBMX                       | kmol/h | 0.00        | 0.00        | 0.00        | 0.00        | 0.00         | 0.00        | 0.00         | 0.00        |
| <b>Stream name</b>         |        | <b>S-19</b> | <b>S-21</b> | <b>S-22</b> | <b>S</b>    | <b>GAS-3</b> | <b>W</b>    | <b>B</b>     | <b>PX</b>   |
| mole flow                  | kmol/h | 994.12      | 192.12      | 920.10      | 3           | 8.02         | 7.63        | 8.50         | 179.0       |
| mass flow                  | kg/h   | 9438.0      | 20397.4     | 77988.9     | 514.88      | 238.85       | 1052.16     | 856.8        | 19003.3     |
| vapor fraction             |        | 0           | 0           | 1           | 0           | 1            | 0           | 0            | 0           |
| temperature                | °C     | 212.71      | 189.0       | 136.11      | 150.00      | 74.25        | 164.70      | 92.83        | 113.88      |
| pressure                   | bar    | 8.20        | 3.30        | 3.00        | 1.50        | 8.00         | 1.05        | 0.48         | 0.50        |
| <b>Component Mole Flow</b> |        |             |             |             |             |              |             |              |             |
| Toluene                    | kmol/h | 787.96      | 0.00        | 787.90      | 0.00        | 0.09         | 0.00        | 0.00         | 0.00        |
| Methanol                   | kmol/h | 0.00        | 0.00        | 107.70      | 0.00        | 1.21         | 0.00        | 0.00         | 0.00        |
| p-X                        | kmol/h | 199.13      | 187.15      | 22.12       | 0.00        | 0.00         | 1.89        | 6.87         | 178.40      |
| Water                      | kmol/h | 0.00        | 0.00        | 9.43        | 0.00        | 0.11         | 0.00        | 0.00         | 0.00        |
| Benzene                    | kmol/h | 1.89        | 0.00        | 1.92        | 0.00        | 0.10         | 0.00        | 1.63         | 0.02        |
| GH                         | kmol/h | 0.00        | 0.00        | 0.98        | 0.00        | 6.58         | 0.00        | 0.00         | 0.00        |
| m-X                        | kmol/h | 2.62        | 2.48        | 0.14        | 0.00        | 0.00         | 0.00        | 0.00         | 0.01        |
| o-X                        | kmol/h | 2.52        | 2.49        | 0.05        | 0.00        | 0.00         | 1.90        | 0.01         | 0.57        |
| TBB                        | kmol/h | 0.00        | 0.00        | 0.00        | 1.00        | 0.00         | 0.18        | 0.00         | 0.00        |
| DTBB                       | kmol/h | 0.00        | 0.00        | 0.00        | 2.00        | 0.00         | 1.17        | 0.00         | 0.00        |
| TBMX                       | kmol/h | 0.00        | 0.00        | 0.00        | 0.00        | 0.00         | 2.47        | 0.00         | 0.00        |

## Case 2: Modified Ashraf's process over catalyst B

The modified process by using the reaction kinetics model for catalyst B in the reaction stage on the basis of Ashraf's process was denoted as Case 2 and shown in Figure S2. The according Material balance is in Table S2.

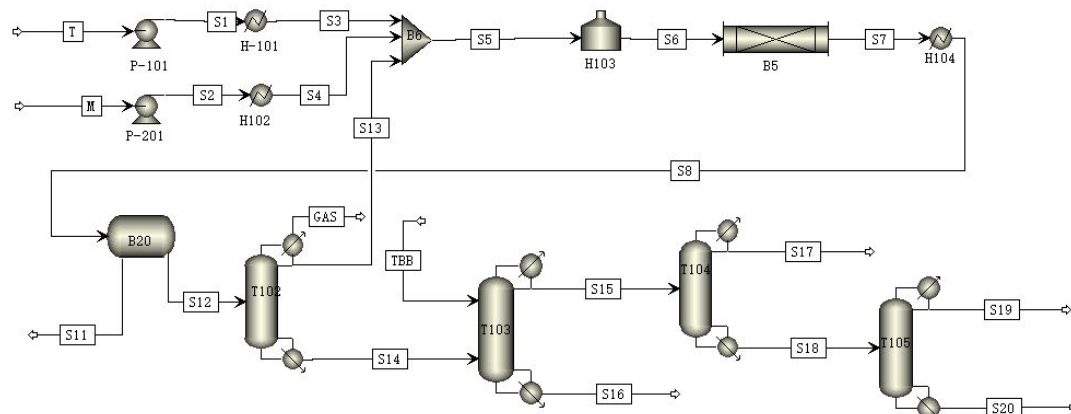

Figure.S2 flowsheet diagram for process case2

Table S2 Material balance of stream for flowsheet in Figure S2

|                               | GAS        | M          | S1         | S2         | S3         | S4         | S5         | S6         | S7         | S8       | S11        |
|-------------------------------|------------|------------|------------|------------|------------|------------|------------|------------|------------|----------|------------|
| T, °C                         | 133.13     | 25.00      | 25.35      | 25.30      | 150.00     | 420.00     | 126.22     | 420.00     | 482.79     | 50.00    | 48.09      |
| P, bar                        | 3.00       | 1.01       | 5.01       | 5.01       | 3.00       | 4.00       | 3.00       | 4.00       | 4.00       | 4.00     | 4.00       |
| Vapor Fraction                | 1.00       | 0.00       | 0.00       | 0.00       | 0.00       | 1.00       | 0.33       | 1.00       | 1.00       | 0.00     | 0.00       |
| Mole flows, kmol/hr           | 1.45       | 197.00     | 193.00     | 197.00     | 193.00     | 197.00     | 1115.52    | 1115.52    | 1115.52    | 1115.52  | 196.46     |
| H <sub>2</sub>                | 0.00       | 0.00       | 0.00       | 0.00       | 0.00       | 0.00       | 0.00       | 0.00       | 0.00       | 0.00     | 0.00       |
| C <sub>2</sub> H <sub>4</sub> | 0.00       | 0.00       | 0.00       | 0.00       | 0.00       | 0.00       | 0.03       | 0.03       | 0.03       | 0.03     | 0.00       |
| Methanol                      | 0.00       | 197.00     | 0.00       | 197.00     | 0.00       | 197.00     | 197.00     | 197.00     | 0.00       | 0.00     | 0.00       |
| Toluene                       | 0.92       | 0.00       | 193.00     | 0.00       | 193.00     | 0.00       | 916.91     | 916.91     | 725.38     | 725.38   | 0.00       |
| OX                            | 0.00       | 0.00       | 0.00       | 0.00       | 0.00       | 0.00       | 0.00       | 0.00       | 3.17       | 3.17     | 0.00       |
| PX                            | 0.00       | 0.00       | 0.00       | 0.00       | 0.00       | 0.00       | 0.00       | 0.00       | 180.14     | 180.14   | 0.00       |
| MX                            | 0.00       | 0.00       | 0.00       | 0.00       | 0.00       | 0.00       | 0.00       | 0.00       | 2.74       | 2.74     | 0.00       |
| TMB                           | 0.00       | 0.00       | 0.00       | 0.00       | 0.00       | 0.00       | 0.00       | 0.00       | 5.48       | 5.48     | 0.00       |
| WATER                         | 0.54       | 0.00       | 0.00       | 0.00       | 0.00       | 0.00       | 1.58       | 1.58       | 198.58     | 198.58   | 196.46     |
| 1:4-D-01                      | 0.00       | 0.00       | 0.00       | 0.00       | 0.00       | 0.00       | 0.00       | 0.00       | 0.00       | 0.00     | 0.00       |
| TERT--01                      | 0.00       | 0.00       | 0.00       | 0.00       | 0.00       | 0.00       | 0.00       | 0.00       | 0.00       | 0.00     | 0.00       |
| 5-TER-01                      | 0.00       | 0.00       | 0.00       | 0.00       | 0.00       | 0.00       | 0.00       | 0.00       | 0.00       | 0.00     | 0.00       |
| Benzene                       | 0.00       | 0.00       | 0.00       | 0.00       | 0.00       | 0.00       | 0.00       | 0.00       | 0.00       | 0.00     | 0.00       |
|                               | <b>S12</b> | <b>S13</b> | <b>S14</b> | <b>S15</b> | <b>S16</b> | <b>S17</b> | <b>S18</b> | <b>S19</b> | <b>S20</b> | <b>T</b> | <b>TBB</b> |
| T, °C                         | 48.09      | 133.13     | 184.74     | 85.09      | 137.68     | 136.23     | 184.64     | 165.66     | 203.32     | 25.00    | 150.00     |
| P, bar                        | 4.00       | 3.00       | 3.00       | 0.20       | 0.20       | 3.00       | 3.00       | 2.00       | 3.00       | 1.01     | 1.50       |
| Vapor Fraction                | 0.00       | 0.00       | 0.00       | 0.00       | 0.00       | 0.00       | 0.00       | 0.00       | 0.00       | 0.00     | 0.00       |
| Mole flows, kmol/h            | 919.05     | 725.52     | 192.08     | 190.22     | 10.26      | 5.14       | 185.08     | 178.68     | 6.40       | 193.00   | 8.40       |
| H <sub>2</sub>                | 0.00       | 0.00       | 0.00       | 0.00       | 0.00       | 0.00       | 0.00       | 0.00       | 0.00       | 0.00     | 0.00       |
| C <sub>2</sub> H <sub>4</sub> | 0.03       | 0.03       | 0.00       | 0.00       | 0.00       | 0.00       | 0.00       | 0.00       | 0.00       | 0.00     | 0.00       |
| Methanol                      | 0.00       | 0.00       | 0.00       | 0.00       | 0.00       | 0.00       | 0.00       | 0.00       | 0.00       | 0.00     | 0.00       |
| Toluene                       | 725.38     | 723.91     | 0.56       | 0.56       | 0.00       | 0.45       | 0.11       | 0.11       | 0.00       | 193.00   | 0.00       |
| OX                            | 3.17       | 0.00       | 3.17       | 3.17       | 0.00       | 0.00       | 3.17       | 0.08       | 3.09       | 0.00     | 0.00       |

|          |        |      |        |        |      |      |        |        |      |      |      |
|----------|--------|------|--------|--------|------|------|--------|--------|------|------|------|
| PX       | 180.14 | 0.00 | 180.14 | 180.14 | 0.00 | 1.61 | 178.53 | 178.35 | 0.18 | 0.00 | 0.00 |
| MX       | 2.74   | 0.00 | 2.74   | 0.14   | 0.00 | 0.00 | 0.14   | 0.14   | 0.00 | 0.00 | 0.00 |
| TMB      | 5.48   | 0.00 | 5.48   | 2.21   | 3.26 | 0.00 | 2.21   | 0.00   | 2.21 | 0.00 | 0.00 |
| WATER    | 2.11   | 1.58 | 0.00   | 0.00   | 0.00 | 0.00 | 0.00   | 0.00   | 0.00 | 0.00 | 0.00 |
| 1:4-D-01 | 0.00   | 0.00 | 0.00   | 0.47   | 4.41 | 0.00 | 0.47   | 0.00   | 0.47 | 0.00 | 4.40 |
| TERT--01 | 0.00   | 0.00 | 0.00   | 0.45   | 0.00 | 0.00 | 0.45   | 0.00   | 0.45 | 0.00 | 4.00 |
| 5-TER-01 | 0.00   | 0.00 | 0.00   | 0.00   | 2.59 | 0.00 | 0.00   | 0.00   | 0.00 | 0.00 | 0.00 |
| Benzene  | 0.00   | 0.00 | 0.00   | 3.07   | 0.00 | 3.07 | 0.00   | 0.00   | 0.00 | 0.00 | 0.00 |

### Case 3: Liu's process over catalyst A

An existing PX production process proposed by Liu et al. <sup>6</sup> was used for Case 3 (Figure S3), which eliminated the methanol recovery tower T-100 and recycling system. And the according Material balance is in Table S3.

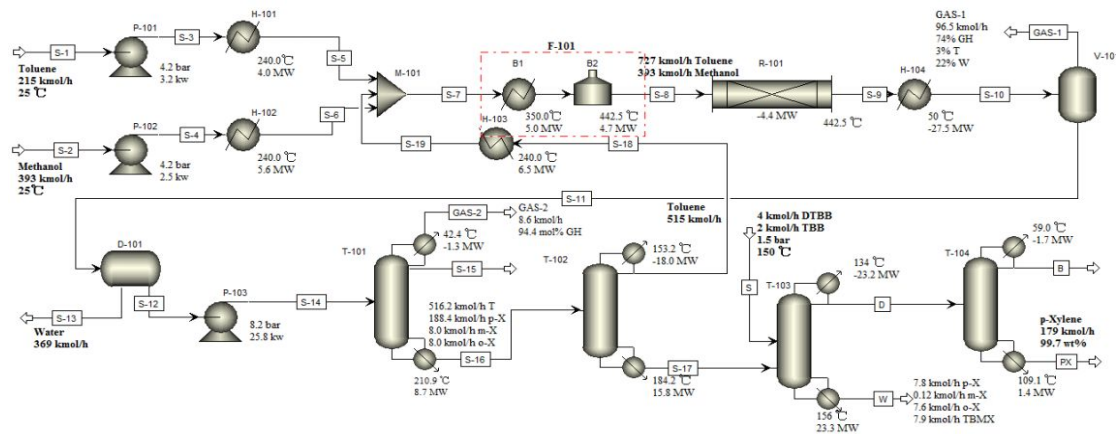

Figure.S3 flowsheet diagram for process case3

**Table S3 Material balance of stream for flowsheet in Figure S3**

| <b>Stream</b>              |        | <b>S-1</b>  | <b>S-2</b>  | <b>S-7</b>  | <b>S-9</b> | <b>GAS-1</b> | <b>S-14</b> | <b>GAS-2</b> |
|----------------------------|--------|-------------|-------------|-------------|------------|--------------|-------------|--------------|
| mole flow                  | kmol/h | 215.24      | 393.00      | 1132.74     | 1226.93    | 96.87        | 750.58      | 8.61         |
| mass flow                  | kg/h   | 19832.30    | 12592.60    | 80633.10    | 80633.10   | 2728.20      | 70932.70    | 252.59       |
| vapor fraction             |        | 0.00        | 0.00        | 1.00        | 1.00       | 1.00         | 0.00        | 0.00         |
| temperature                | °C     | 25.00       | 25.00       | 240.00      | 442.50     | 25.00        | 21.00       | 42.44        |
| pressure                   | bar    | 1.00        | 1.00        | 4.00        | 4.00       | 1.10         | 8.20        | 8.00         |
| <b>Component Mole Flow</b> |        |             |             |             |            |              |             |              |
| Toluene                    | kmol/h | 215.24      | 0.00        | 727.29      | 515.56     | 1.82         | 513.69      | 0.00         |
| Methanol                   | kmol/h | 0.00        | 393.00      | 393.00      | 8.40       | 0.12         | 2.09        | 0.09         |
| p-X                        | kmol/h | 0.00        | 0.00        | 1.90        | 189.58     | 0.23         | 189.34      | 0.00         |
| Water                      | kmol/h | 0.00        | 0.00        | 0.00        | 384.60     | 13.50        | 2.23        | 0.15         |
| Benzene                    | kmol/h | 0.00        | 0.00        | 10.49       | 18.24      | 0.20         | 18.03       | 0.24         |
| GH                         | kmol/h | 0.00        | 0.00        | 0.00        | 94.19      | 80.97        | 8.84        | 8.13         |
| m-X                        | kmol/h | 0.00        | 0.00        | 0.06        | 8.21       | 0.01         | 8.20        | 0.00         |
| o-X                        | kmol/h | 0.00        | 0.00        | 0.01        | 8.16       | 0.01         | 8.15        | 0.00         |
| TBB                        | kmol/h | 0.00        | 0.00        | 0.00        | 0.00       | 0.00         | 0.00        | 0.00         |
| DTBB                       | kmol/h | 0.00        | 0.00        | 0.00        | 0.00       | 0.00         | 0.00        | 0.00         |
| TBMX                       | kmol/h | 0.00        | 0.00        | 0.00        | 0.00       | 0.00         | 0.00        | 0.00         |
| <b>Stream name</b>         |        | <b>S-15</b> | <b>S-17</b> | <b>S-19</b> | <b>S</b>   | <b>W</b>     | <b>B</b>    | <b>PX</b>    |
| mole flow                  | kmol/h | 12.39       | 205.08      | 524.50      | 6.00       | 23.57        | 8.50        | 179.00       |
| mass flow                  | kg/h   | 718.61      | 21753.30    | 48208.20    | 914.54     | 2951.12      | 716.70      | 19003.00     |
| vapor fraction             |        | 0           | 0.00        | 1.00        | 0.00       | 1.00         | 0.00        | 0.00         |
| temperature                | °C     | 21.09       | 184.25      | 240.00      | 150.00     | 156.19       | 59.00       | 109.05       |
| pressure                   | bar    | 8           | 3.00        | 4.00        | 1.50       | 1.06         | 0.40        | 0.43         |
| <b>Component Mole Flow</b> |        |             |             |             |            |              |             |              |
| Toluene                    | kmol/h | 0.29        | 1.35        | 512.05      | 0.00       | 0.00         | 1.28        | 0.07         |
| Methanol                   | kmol/h | 2           | 0.00        | 0.00        | 0.00       | 0.00         | 0.00        | 0.00         |
| p-X                        | kmol/h | 0           | 187.44      | 1.90        | 0.00       | 7.84         | 1.24        | 178.37       |
| Water                      | kmol/h | 2.08        | 0.00        | 0.00        | 0.00       | 0.00         | 0.00        | 0.00         |
| Benzene                    | kmol/h | 7.31        | 0.00        | 10.48       | 0.00       | 0.00         | 5.98        | 0.00         |
| GH                         | kmol/h | 0.71        | 0.00        | 0.00        | 0.00       | 0.00         | 0.00        | 0.00         |
| m-X                        | kmol/h | 0           | 8.14        | 0.06        | 0.10       | 0.15         | 0.00        | 0.02         |
| o-X                        | kmol/h | 0           | 8.14        | 0.01        | 0.00       | 7.60         | 0.00        | 0.50         |
| TBB                        | kmol/h | 0           | 0.00        | 0.00        | 4.00       | 0.01         | 0.00        | 0.00         |
| DTBB                       | kmol/h | 0           | 0.00        | 0.00        | 2.00       | 0.01         | 0.00        | 0.00         |
| TBMX                       | kmol/h | 0           | 0.00        | 0.00        | 0.00       | 7.97         | 0.00        | 0.00         |

### Case 4: Modified Liu's process over catalyst B

The modified process by using the reaction kinetics model for catalyst B in the reaction stage on the basis of Liu's process was denoted as Case 4 and shown in Figure S4. The according Material balance is in Table S4.

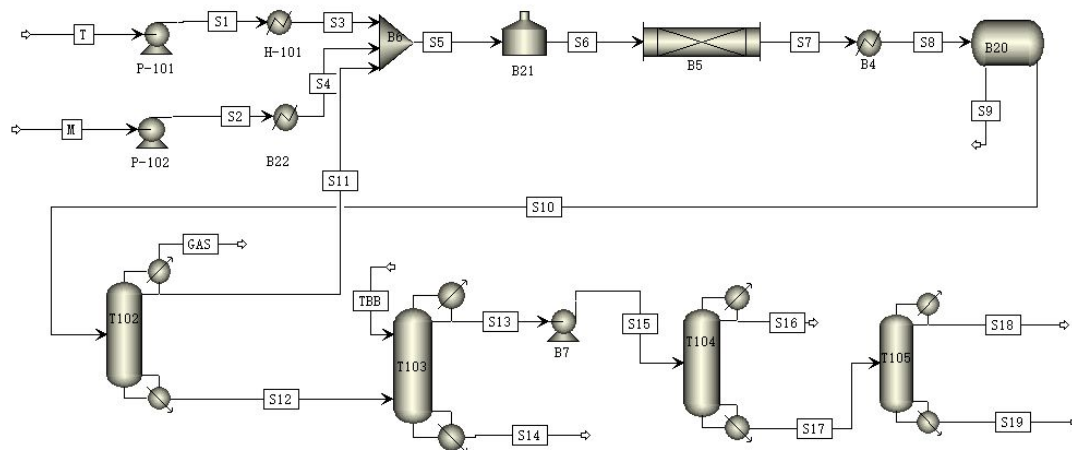

Figure.S4 flowsheet diagram for process case4

Table S4 Material balance of stream for flowsheet in Figure S4

|                               | GAS        | M          | S1         | S2         | S3         | S4         | S5         | S6         | S7         | S8       | S9         | S10    |
|-------------------------------|------------|------------|------------|------------|------------|------------|------------|------------|------------|----------|------------|--------|
| T, °C                         | 133.75     | 25.00      | 25.35      | 25.30      | 150.00     | 420.00     | 126.39     | 442.50     | 503.87     | 50.00    | 48.13      | 48.13  |
| P, bar                        | 3.00       | 1.01       | 5.01       | 5.01       | 3.00       | 4.00       | 3.00       | 4.00       | 4.00       | 4.00     | 4.00       | 4.00   |
| Vapor Fraction                | 1.00       | 0.00       | 0.00       | 0.00       | 0.00       | 1.00       | 0.33       | 1.00       | 1.00       | 0.00     | 0.00       | 0.00   |
| Mole flows kmol/hr            | 1.68       | 197.00     | 194.00     | 197.00     | 194.00     | 197.00     | 1119.48    | 1119.48    | 1119.48    | 1119.48  | 196.40     | 923.08 |
| H <sub>2</sub>                | 0.00       | 0.00       | 0.00       | 0.00       | 0.00       | 0.00       | 0.00       | 0.00       | 0.00       | 0.00     | 0.00       | 0.00   |
| C <sub>2</sub> H <sub>4</sub> | 0.00       | 0.00       | 0.00       | 0.00       | 0.00       | 0.00       | 0.02       | 0.02       | 0.02       | 0.02     | 0.00       | 0.02   |
| Methanol                      | 0.00       | 197.00     | 0.00       | 197.00     | 0.00       | 197.00     | 197.00     | 197.00     | 0.00       | 0.00     | 0.00       | 0.00   |
| Toluenen                      | 1.08       | 0.00       | 194.00     | 0.00       | 194.00     | 0.00       | 920.93     | 920.93     | 729.03     | 729.03   | 0.00       | 729.03 |
| OX                            | 0.00       | 0.00       | 0.00       | 0.00       | 0.00       | 0.00       | 0.00       | 0.00       | 3.58       | 3.58     | 0.00       | 3.58   |
| PX                            | 0.00       | 0.00       | 0.00       | 0.00       | 0.00       | 0.00       | 0.00       | 0.00       | 180.16     | 180.16   | 0.00       | 180.16 |
| MX                            | 0.00       | 0.00       | 0.00       | 0.00       | 0.00       | 0.00       | 0.00       | 0.00       | 3.08       | 3.08     | 0.00       | 3.08   |
| TMB                           | 0.00       | 0.00       | 0.00       | 0.00       | 0.00       | 0.00       | 0.00       | 0.00       | 5.10       | 5.10     | 0.00       | 5.10   |
| WATER                         | 0.60       | 0.00       | 0.00       | 0.00       | 0.00       | 0.00       | 1.52       | 1.52       | 198.52     | 198.52   | 196.40     | 2.12   |
| 1:4-D-01                      | 0.00       | 0.00       | 0.00       | 0.00       | 0.00       | 0.00       | 0.00       | 0.00       | 0.00       | 0.00     | 0.00       | 0.00   |
| TERT-01                       | 0.00       | 0.00       | 0.00       | 0.00       | 0.00       | 0.00       | 0.00       | 0.00       | 0.00       | 0.00     | 0.00       | 0.00   |
| 5-TER-01                      | 0.00       | 0.00       | 0.00       | 0.00       | 0.00       | 0.00       | 0.00       | 0.00       | 0.00       | 0.00     | 0.00       | 0.00   |
| Benzene                       | 0.00       | 0.00       | 0.00       | 0.00       | 0.00       | 0.00       | 0.00       | 0.00       | 0.00       | 0.00     | 0.00       | 0.00   |
|                               | <b>S11</b> | <b>S12</b> | <b>S13</b> | <b>S14</b> | <b>S15</b> | <b>S16</b> | <b>S17</b> | <b>S18</b> | <b>S19</b> | <b>T</b> | <b>TBB</b> |        |
| T, °C                         | 133.75     | 184.61     | 84.90      | 138.04     | 85.00      | 133.52     | 184.60     | 184.07     | 201.84     | 25.00    | 150.00     |        |
| P, bar                        | 3.00       | 3.00       | 0.20       | 0.20       | 3.00       | 3.00       | 3.00       | 3.00       | 3.00       | 1.01     | 1.50       |        |
| Vapor Fraction                | 0.00       | 0.00       | 0.00       | 0.00       | 0.00       | 0.00       | 0.00       | 0.00       | 0.00       | 0.00     | 0.00       |        |
| Mole flows kmol/hr            | 728.48     | 192.92     | 191.02     | 10.31      | 191.02     | 5.32       | 185.90     | 179.17     | 6.53       | 194.00   | 8.40       |        |
| H <sub>2</sub>                | 0.00       | 0.00       | 0.00       | 0.00       | 0.00       | 0.00       | 0.00       | 0.00       | 0.00       | 0.00     | 0.00       |        |
| C <sub>2</sub> H <sub>4</sub> | 0.02       | 0.00       | 0.00       | 0.00       | 0.00       | 0.00       | 0.00       | 0.00       | 0.00       | 0.00     | 0.00       |        |
| Methanol                      | 0.00       | 0.00       | 0.00       | 0.00       | 0.00       | 0.00       | 0.00       | 0.00       | 0.00       | 0.00     | 0.00       |        |
| Toluenen                      | 726.93     | 1.02       | 1.02       | 0.00       | 1.02       | 0.99       | 0.03       | 0.03       | 0.00       | 194.00   | 0.00       |        |

|          |      |        |        |      |        |      |        |        |      |      |      |  |
|----------|------|--------|--------|------|--------|------|--------|--------|------|------|------|--|
| OX       | 0.00 | 3.58   | 3.58   | 0.00 | 3.58   | 0.00 | 3.58   | 0.31   | 3.27 | 0.00 | 0.00 |  |
| PX       | 0.00 | 180.15 | 180.15 | 0.00 | 180.15 | 1.10 | 179.05 | 178.66 | 0.39 | 0.00 | 0.00 |  |
| MX       | 0.00 | 3.08   | 0.18   | 0.00 | 0.18   | 0.00 | 0.18   | 0.18   | 0.00 | 0.00 | 0.00 |  |
| TMB      | 0.00 | 5.10   | 1.94   | 3.15 | 1.94   | 0.00 | 1.94   | 0.00   | 1.94 | 0.00 | 0.00 |  |
| WATER    | 1.52 | 0.00   | 0.00   | 0.00 | 0.00   | 0.00 | 0.00   | 0.00   | 0.00 | 0.00 | 0.00 |  |
| 1:4-D-01 | 0.00 | 0.00   | 0.47   | 4.26 | 0.47   | 0.00 | 0.47   | 0.00   | 0.47 | 0.00 | 4.40 |  |
| TERT--01 | 0.00 | 0.00   | 0.45   | 0.00 | 0.45   | 0.00 | 0.45   | 0.00   | 0.45 | 0.00 | 4.00 |  |
| 5-TER-01 | 0.00 | 0.00   | 0.00   | 2.90 | 0.00   | 0.00 | 0.00   | 0.00   | 0.00 | 0.00 | 0.00 |  |
| Benzene  | 0.00 | 0.00   | 3.23   | 0.00 | 3.23   | 3.23 | 0.00   | 0.00   | 0.00 | 0.00 | 0.00 |  |

## Case 5: Short process over catalyst A

The proposed short processes using catalysts A was presented in the Figure S5, which retained the methanol recovery tower (T-100) and recycling system but removed the reactive distillation tower (T-103). The according Material balance is in Table S5.

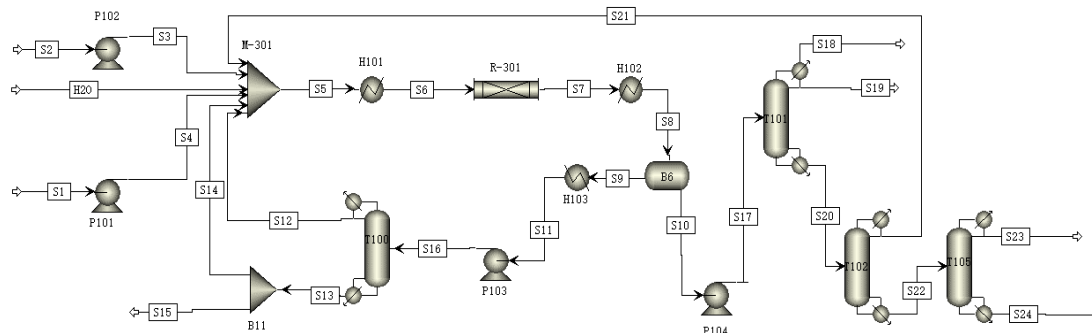

Figure.S5 flowsheet diagram for process case5

Table S5 Material balance of stream for flowsheet in Figure S5

|                               | H <sub>2</sub> O | S1      | S2      | S3      | S4      | S5      | S6      | S7      | S8      | S9      | S10     | S11     | S12    |
|-------------------------------|------------------|---------|---------|---------|---------|---------|---------|---------|---------|---------|---------|---------|--------|
| T, °C                         | 25.00            | 25.00   | 25.00   | 25.10   | 25.17   | 45.37   | 442.50  | 442.50  | 40.00   | 1.00    | 1.00    | 70.00   | 89.87  |
| P, bar                        | 3.00             | 1.00    | 1.00    | 3.00    | 3.00    | 1.00    | 4.00    | 4.00    | 4.00    | 1.00    | 1.00    | 3.00    | 3.00   |
| Vapor Fraction                | 0.00             | 0.00    | 0.00    | 0.00    | 0.00    | 0.00    | 1.00    | 1.00    | 0.00    | 0.00    | 0.00    | 0.00    | 0.00   |
| Mole flows kmol/hr            | 2000.00          | 207.00  | 257.00  | 257.00  | 207.00  | 9462.88 | 9462.88 | 9495.24 | 9495.24 | 5790.12 | 3705.12 | 5790.12 | 324.39 |
| C <sub>2</sub> H <sub>4</sub> | 0.00             | 0.00    | 0.00    | 0.00    | 0.00    | 1.00    | 1.00    | 33.37   | 33.37   | 1.00    | 32.36   | 1.00    | 1.00   |
| Methanol                      | 0.00             | 0.00    | 257.00  | 257.00  | 0.00    | 566.17  | 566.17  | 334.05  | 334.05  | 309.92  | 24.13   | 309.92  | 308.07 |
| Benzene                       | 0.00             | 0.00    | 0.00    | 0.00    | 0.00    | 12.35   | 12.35   | 24.23   | 24.23   | 0.02    | 24.21   | 0.02    | 0.02   |
| Toluene                       | 0.00             | 207.00  | 0.00    | 0.00    | 207.00  | 3633.74 | 3633.74 | 3442.59 | 3442.59 | 1.69    | 3440.90 | 1.69    | 1.69   |
| OX                            | 0.00             | 0.00    | 0.00    | 0.00    | 0.00    | 0.00    | 0.00    | 0.61    | 0.61    | 0.00    | 0.61    | 0.00    | 0.00   |
| PX                            | 0.00             | 0.00    | 0.00    | 0.00    | 0.00    | 1.17    | 1.17    | 179.22  | 179.22  | 0.02    | 179.20  | 0.02    | 0.02   |
| MX                            | 0.00             | 0.00    | 0.00    | 0.00    | 0.00    | 0.24    | 0.24    | 0.86    | 0.86    | 0.00    | 0.86    | 0.00    | 0.00   |
| WATER                         | 2000.00          | 0.00    | 0.00    | 0.00    | 0.00    | 5248.20 | 5248.20 | 5480.31 | 5480.31 | 5477.46 | 2.86    | 5477.46 | 13.59  |
|                               | S13              | S14     | S15     | S16     | S17     | S18     | S19     | S20     | S21     | S22     | S23     | S24     |        |
| T, °C                         | 133.52           | 133.52  | 133.52  | 70.00   | 1.05    | 64.96   | 64.96   | 111.10  | 110.06  | 137.90  | 137.88  | 142.29  |        |
| P, bar                        | 3.00             | 3.00    | 3.00    | 3.00    | 2.20    | 1.00    | 1.00    | 1.00    | 1.00    | 1.00    | 1.00    | 1.00    |        |
| Vapor Fraction                | 0.00             | 0.00    | 0.00    | 0.00    | 0.00    | 1.00    | 0.00    | 0.00    | 0.00    | 0.00    | 0.00    | 0.00    |        |
| Mole flows kmol/hr            | 5465.73          | 3235.71 | 2230.02 | 5790.12 | 3705.12 | 85.33   | 1.74    | 3618.05 | 3438.98 | 179.67  | 178.83  | 0.85    |        |
| C <sub>2</sub> H <sub>4</sub> | 0.00             | 0.00    | 0.00    | 1.00    | 32.36   | 32.34   | 0.02    | 0.00    | 0.00    | 0.00    | 0.00    | 0.00    |        |
| Methanol                      | 1.86             | 1.10    | 0.76    | 309.92  | 24.13   | 24.06   | 0.07    | 0.00    | 0.00    | 0.00    | 0.00    | 0.00    |        |
| Benzene                       | 0.00             | 0.00    | 0.00    | 0.02    | 24.21   | 11.52   | 0.37    | 12.32   | 12.32   | 0.00    | 0.00    | 0.00    |        |
| Toluene                       | 0.00             | 0.00    | 0.00    | 1.69    | 3440.90 | 14.56   | 1.29    | 3425.06 | 3425.06 | 0.00    | 0.00    | 0.00    |        |
| OX                            | 0.00             | 0.00    | 0.00    | 0.00    | 0.61    | 0.00    | 0.00    | 0.61    | 0.00    | 0.61    | 0.00    | 0.61    |        |
| PX                            | 0.00             | 0.00    | 0.00    | 0.02    | 179.20  | 0.00    | 0.00    | 179.20  | 1.16    | 178.65  | 178.42  | 0.23    |        |
| MX                            | 0.00             | 0.00    | 0.00    | 0.00    | 0.86    | 0.00    | 0.00    | 0.86    | 0.44    | 0.41    | 0.41    | 0.03    |        |
| WATER                         | 5463.87          | 3234.61 | 2229.26 | 5477.46 | 2.86    | 2.85    | 0.00    | 0.00    | 0.00    | 0.00    | 0.00    | 0.00    |        |



## Case 6: Short process over catalyst B

The proposed short processes using catalysts B was presented in the Figure S6, which removed both the benzene tower (T-101) and the reactive distillation tower (T-103). The according Material balance is in Table S6.

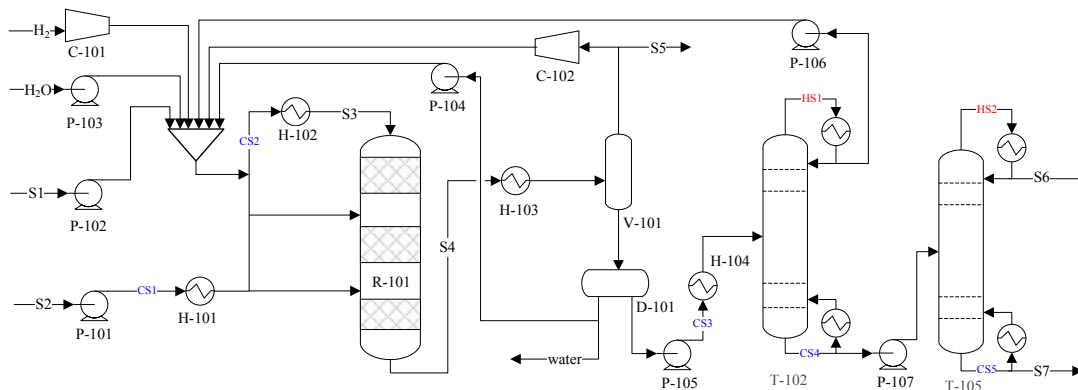

Figure.S6 flowsheet diagram for process case6

Table S6 Material balance of stream for flowsheet in Figure S6

|                                       | S1     | S2      | S3     | S4     | S5      | S6      | S7     | S8      | S9     | S10    |
|---------------------------------------|--------|---------|--------|--------|---------|---------|--------|---------|--------|--------|
| T, °C                                 | 25.00  | 25.00   | 25.00  | 25.00  | 470.00  | 478.40  | 40.00  | 27.00   | 165.65 | 224.53 |
| P, kPa                                | 100.00 | 100.00  | 100.00 | 100.00 | 350.00  | 350.00  | 300.00 | 300.00  | 200.00 | 400.00 |
| Vapor Fraction                        | 1.00   | 0.00    | 0.00   | 0.00   | 1.00    | 1.00    | 1.00   | 0.00    | 0.00   | 0.00   |
| Mole Flows<br>(kmol·h <sup>-1</sup> ) | 90.00  | 2371.00 | 185.50 | 187.00 | 9448.66 | 9579.56 | 95.09  | 2555.18 | 179.13 | 4.12   |
| H <sub>2</sub>                        | 90.00  | 0.00    | 0.00   | 0.00   | 907.68  | 907.68  | 90.00  | 0.00    | 0.00   | 0.00   |
| C <sub>2</sub> H <sub>4</sub>         | 0.00   | 0.00    | 0.00   | 0.00   | 0.06    | 0.06    | 0.00   | 0.00    | 0.00   | 0.00   |
| M                                     | 0.00   | 0.00    | 0.00   | 187.00 | 70.90   | 14.82   | 0.02   | 0.00    | 0.00   | 0.00   |
| T                                     | 0.00   | 0.00    | 185.50 | 0.00   | 1523.41 | 1340.26 | 2.20   | 0.00    | 0.15   | 0.00   |
| OX                                    | 0.00   | 0.00    | 0.00   | 0.00   | 0.00    | 0.24    | 0.00   | 0.00    | 0.12   | 0.12   |
| PX                                    | 0.00   | 0.00    | 0.00   | 0.00   | 0.56    | 179.39  | 0.06   | 0.00    | 178.59 | 0.18   |
| MX                                    | 0.00   | 0.00    | 0.00   | 0.00   | 0.00    | 0.27    | 0.00   | 0.00    | 0.27   | 0.00   |
| TMB                                   | 0.00   | 0.00    | 0.00   | 0.00   | 0.00    | 3.82    | 0.00   | 0.00    | 0.00   | 3.82   |
| H <sub>2</sub> O                      | 0.00   | 2371.00 | 0.00   | 0.00   | 6946.05 | 7133.03 | 2.81   | 2555.18 | 0.00   | 0.00   |

## 2 Heat integration for six cases

### Case 1: Ashraf's process over catalyst A

The process flow data and results for heat integration information of case 1 were shown in Table S7, Figure S7 and Figure S8.

**Table S7 process flow data for Case1**

| Stream  | Temperature °C |        | Enthalpy, MW |
|---------|----------------|--------|--------------|
|         | in             | out    |              |
| S9-S10  | 400.00         | 50.00  | 34.58        |
| S22-S23 | 136.10         | 240.00 | 11.55        |
| S3-S5   | 25.00          | 240.00 | 4.01         |
| S4-S6   | 25.00          | 240.00 | 5.60         |
| S7-S8   | 240.00         | 400.00 | 10.37        |
| T1-D    | 105.80         | 70.80  | 3.36         |
| T1-W    | 145.80         | 145.90 | 3.99         |
| T2-D    | 142.80         | 74.20  | 2.73         |
| T2-W    | 211.50         | 212.70 | 11.81        |
| T3-D    | 156.40         | 156.00 | 27.52        |
| T3-W    | 188.80         | 189.00 | 24.49        |
| T4-D    | 137.80         | 136.90 | 22.69        |
| T4-W    | 147.40         | 164.70 | 22.06        |
| T5-D    | 107.30         | 92.80  | 0.92         |
| T5-W    | 113.80         | 113.90 | 0.65         |

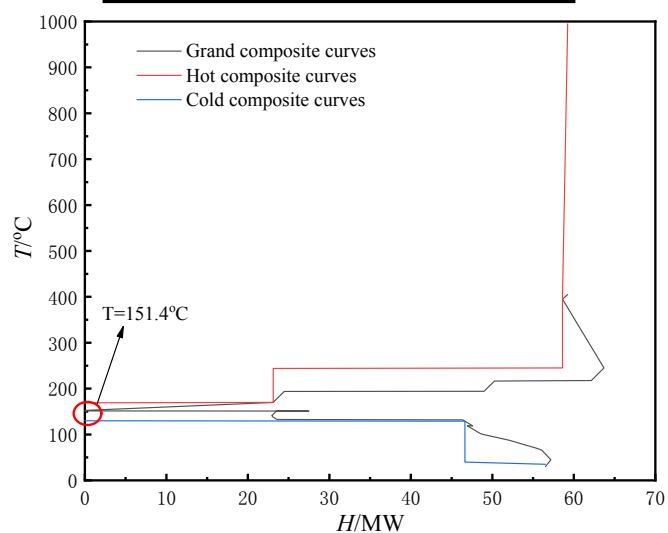

**Figure.S7** the composite curve of cold and hot logistics in the process for Case1

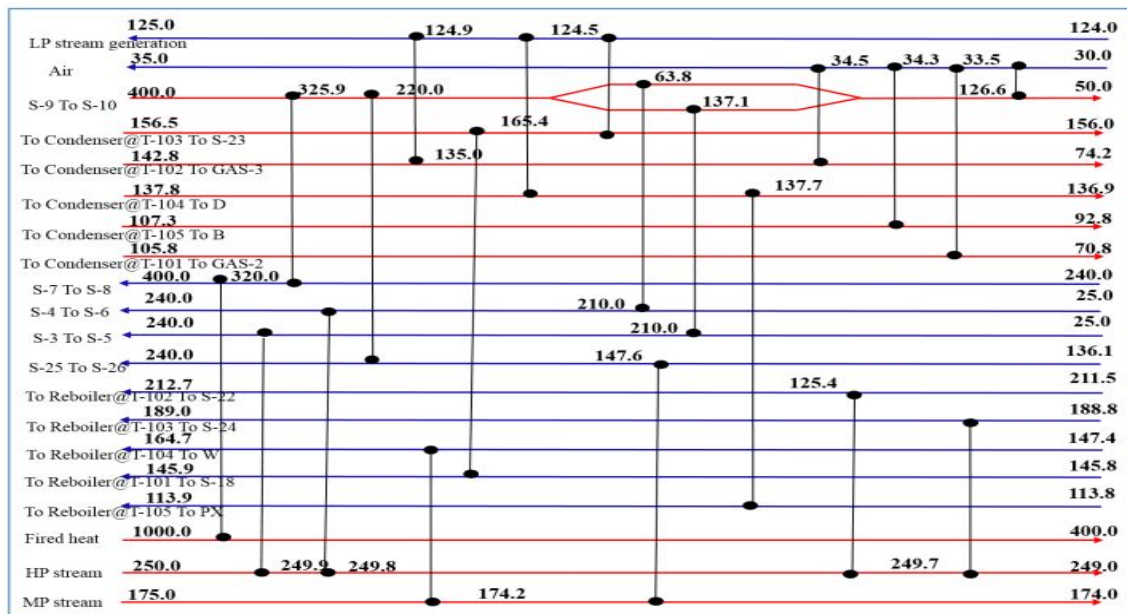

Figure.S8 The HEN diagram for the process of Case1

## Case 2: Modified Ashraf's process over catalyst B

The process flow data and results for heat integration information of case 2 were shown in Table S8, Figure S9 and Figure S10.

**Table S8 process flow data for Case2**

| Stream | Temperature °C |        | Enthalpy, MW |
|--------|----------------|--------|--------------|
|        | in             | out    |              |
| S2-S4  | 25.30          | 420.00 | 3.35         |
| S7-S8  | 482.79         | 50.00  | 33.01        |
| S5-S6  | 126.23         | 420.00 | 21.16        |
| S1-S3  | 25.35          | 150.00 | 1.18         |
| T105-W | 202.82         | 203.32 | 16.70        |
| T105-D | 166.16         | 165.66 | 16.93        |
| T104-D | 153.79         | 136.23 | 0.96         |
| T103-W | 119.13         | 137.68 | 19.00        |
| T102-W | 184.39         | 184.74 | 23.00        |
| T102-D | 153.73         | 133.16 | 18.30        |
| T103-D | 87.13          | 85.09  | 19.93        |
| T104-W | 184.48         | 184.64 | 2.15         |

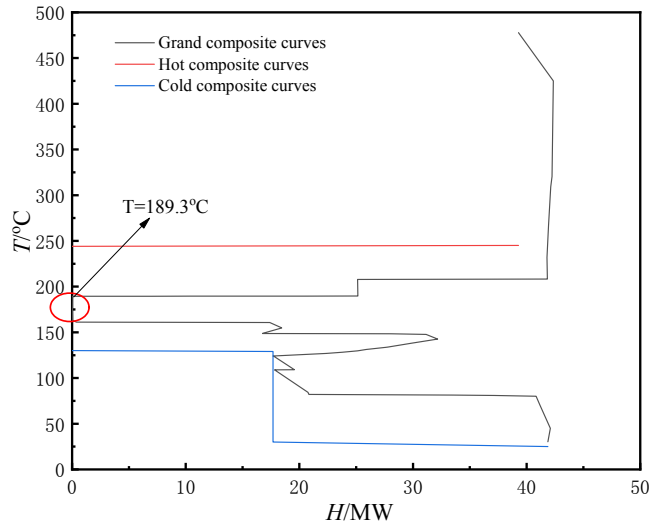

Figure.S9 the composite curve of cold and hot logistics in the process for Case2

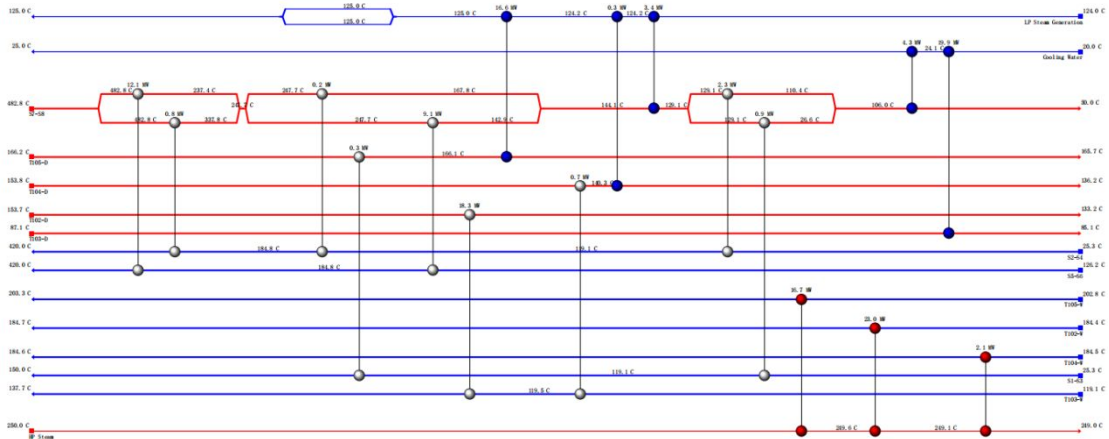

Figure.S10 The HEN diagram for the process of Case2

### Case 3: Liu's process over catalyst A

The process flow data and results for heat integration information of case 3 were shown in Table S9, Figure S11 and Figure S12.

**Table S9 process flow data for Case3**

| Stream   | Temperature °C |        | Enthalpy, MW |
|----------|----------------|--------|--------------|
|          | in             | out    |              |
| S9-S10   | 442.50         | 50.00  | 27.55        |
| S3-S5    | 25.00          | 240.00 | 4.00         |
| S4-S6    | 25.00          | 240.00 | 5.63         |
| S18-S19  | 153.20         | 240.00 | 6.53         |
| S7-S8    | 240.00         | 442.50 | 9.81         |
| V101Heat | 50.00          | 25.00  | 0.98         |
| T1-D     | 147.20         | 42.40  | 1.27         |
| T1-W     | 209.00         | 210.90 | 8.66         |
| T2-D     | 153.70         | 153.20 | 17.99        |
| T2-W     | 184.00         | 184.20 | 15.81        |
| T3-D     | 137.00         | 133.90 | 22.97        |

|      |        |        |       |
|------|--------|--------|-------|
| T3-W | 145.70 | 156.20 | 22.34 |
| T4-D | 73.70  | 59.00  | 2.01  |
| T4-W | 108.90 | 109.10 | 1.72  |

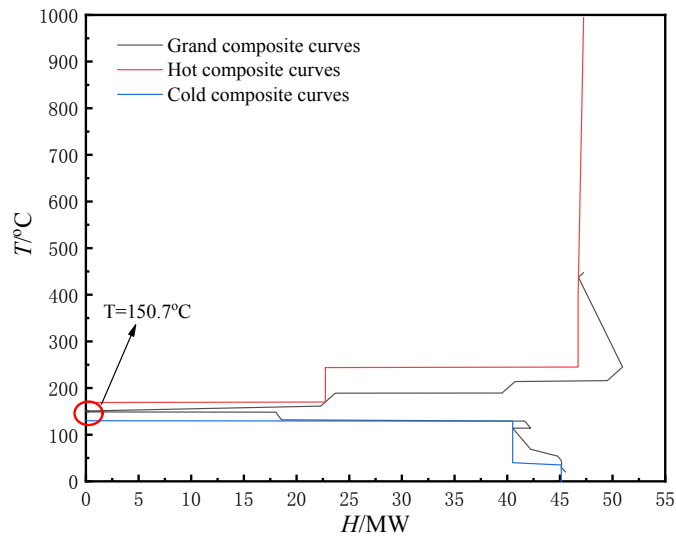

Figure.S11 the composite curve of cold and hot logistics in the process for Case3

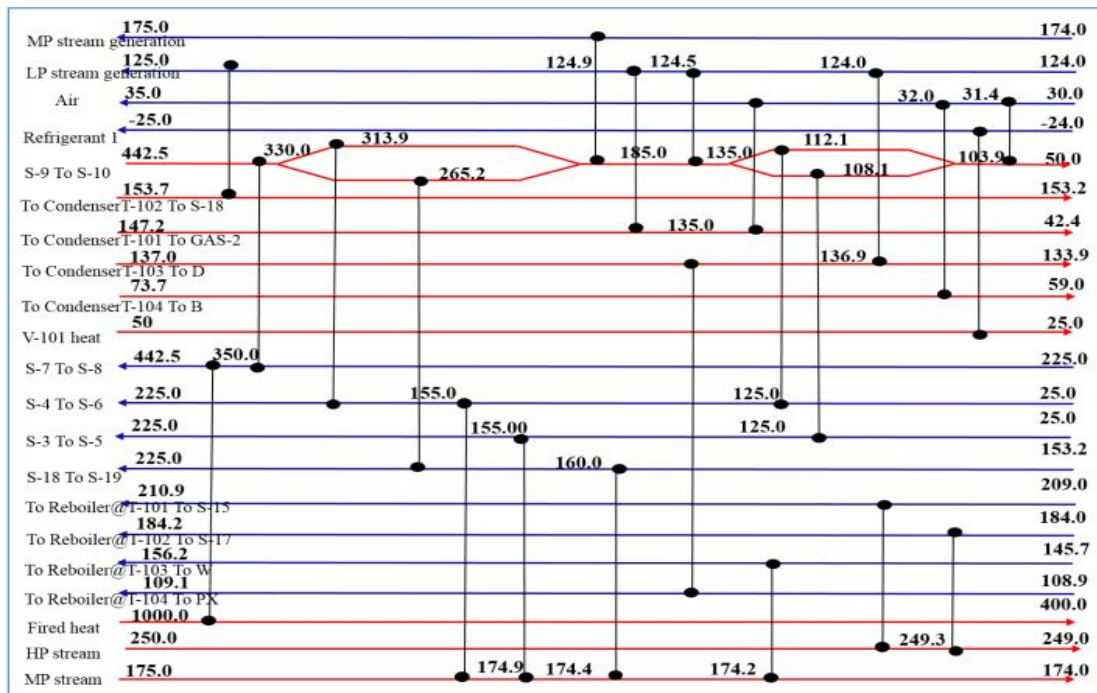

Figure.S12 The HEN diagram for the process of Case3

#### Case 4: Modified Liu's process over catalyst B

The process flow data and results for heat integration information of case 4 were shown in Table S10, Figure S13 and Figure S14.

**Table S10 process flow data for Case4**

| Stream | Temperature °C |        | Enthalpy, MW |
|--------|----------------|--------|--------------|
|        | in             | out    |              |
| S2-S4  | 25.30          | 420.00 | 3.35         |
| S7-S8  | 504.16         | 50.00  | 34.32        |
| S5-S6  | 126.37         | 442.50 | 22.45        |
| S1-S3  | 25.35          | 150.00 | 1.18         |
| T105-W | 201.83         | 202.33 | 16.66        |
| T105-D | 166.18         | 165.68 | 16.88        |
| T104-D | 155.21         | 136.02 | 0.96         |
| T103-W | 119.67         | 138.15 | 18.98        |
| T102-W | 184.55         | 184.81 | 23.00        |
| T102-D | 153.73         | 133.77 | 18.28        |
| T103-D | 87.12          | 85.10  | 19.92        |
| T104-W | 184.50         | 184.65 | 2.15         |

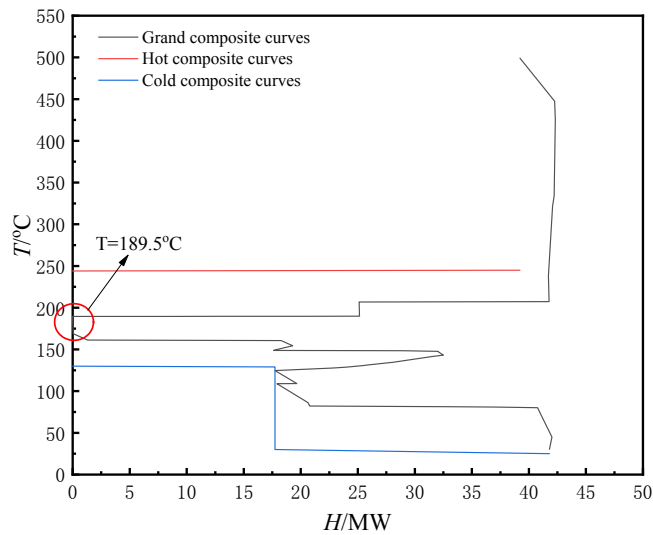

**Figure.S13 the composite curve of cold and hot logistics in the process for Case4**

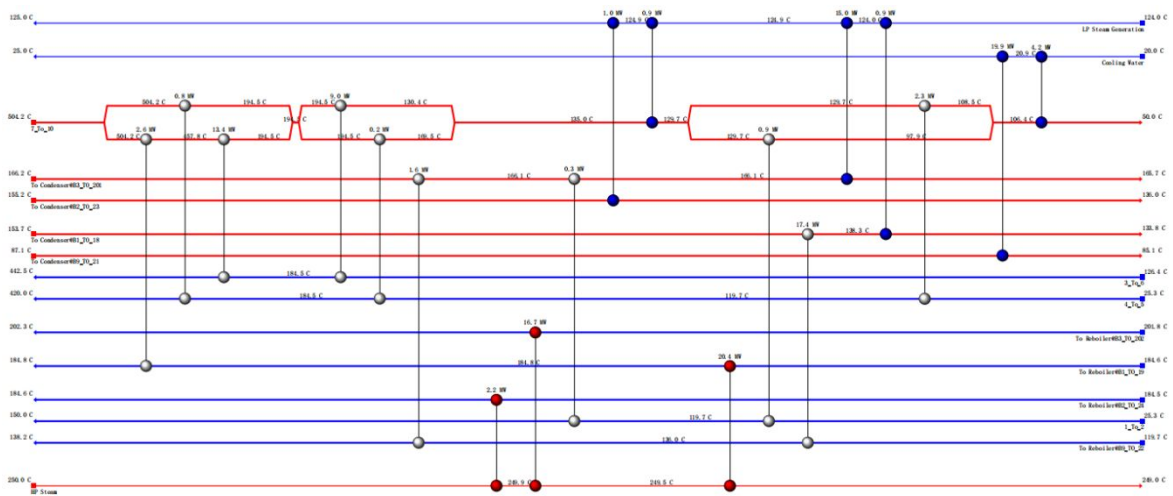

**Figure.S14 The HEN diagram for the process of Case4**

## Case 5: Short process over catalyst A

The process flow data and results for heat integration information of case 5 were shown in Table S11, Figure S15 and Figure S16.

**Table S11 process flow data for Case5**

| Stream | Temperature °C |        | Enthalpy, MW |
|--------|----------------|--------|--------------|
|        | in             | out    |              |
| S9-    | 25.00          | 70.00  | 7.81         |
| S5-S6  | 44.89          | 442.50 | 181.07       |
| S7-S8  | 442.50         | 40.00  | 193.13       |
| T3-D   | 138.38         | 137.88 | 15.09        |
| T3-W   | 141.91         | 142.41 | 15.09        |
| T4-D   | 96.40          | 89.86  | 13.49        |
| T1-W   | 110.79         | 111.11 | 22.76        |
| T2-W   | 137.90         | 138.50 | 67.00        |
| T1-D   | 98.28          | 64.25  | 3.82         |
| T4-W   | 133.40         | 133.52 | 21.35        |
| T2-D   | 110.20         | 109.00 | 77.00        |

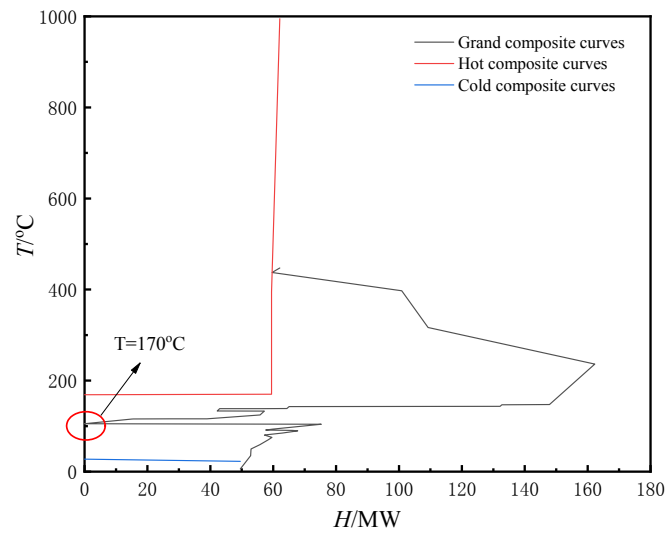

**Figure.S15 the composite curve of cold and hot logistics in the process for Case5**

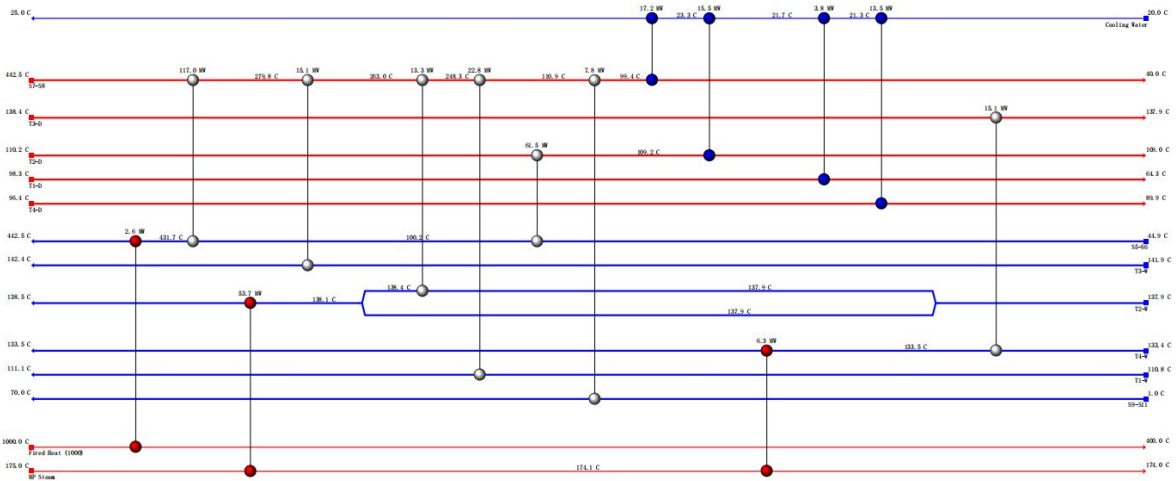

Figure.S16 The HEN diagram for the process of Case5

### Case 6: Short process over catalyst B

The process flow data and results for heat integration information of case 1 were shown in Table S12, Figure S17 and Figure S18.

**Table S12 process flow data for Case6**

| Stream | Temperature °C |        | Enthalpy, MW |
|--------|----------------|--------|--------------|
|        | in             | out    |              |
| CS1    | 25.00          | 90.00  | 0.39         |
| CS2    | 77.00          | 470.00 | 147.20       |
| CS3    | 28.90          | 150.00 | 11.06        |
| CS4    | 165.90         | 166.10 | 27.80        |
| CS5    | 224.00         | 224.50 | 8.74         |
| HS1    | 479.00         | 40.00  | 171.20       |
| HS2    | 136.10         | 135.50 | 18.46        |
| HS3    | 166.20         | 165.70 | 8.73         |

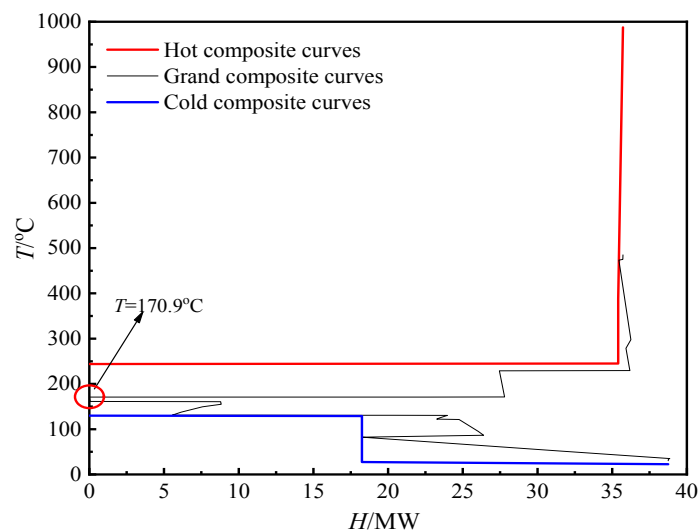

Figure.S17 the composite curve of cold and hot logistics in the process for Case6



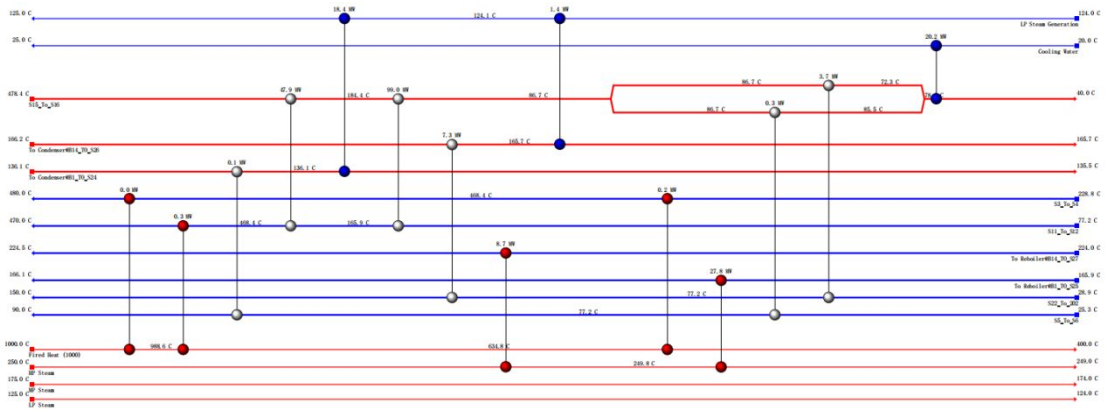

Figure.S18 The HEN diagram for the process of Case6
